# Supplementary material
Source: PubMed Central journal article supplement (PMC3296566)
Supplement: NIHMS313473-supplement-Supplement1.pdf [file NIHMS313473-supplement-Supplement1.pdf]

## Supplementary Appendix

This appendix has been provided by the authors to give readers additional information about their work.

Supplement to: King MS, Eisenberg R, Newman JH, et al. Constrictive bronchiolitis in soldiers returning from Iraq and Afghanistan. *N Engl J Med* 2011;365:222-30.

| <b>Table of Contents</b>                                 | <b>Section</b> |
|----------------------------------------------------------|----------------|
| Acknowledgements                                         | 1              |
| Patient Demographics                                     | 2              |
| Chest Radiographs and HRCT Results                       | 3              |
| Pulmonary Function Testing                               | 4              |
| Cardiopulmonary Exercise Testing                         | 5              |
| Distribution of Involved Airways and Histologic Findings | 6              |

## **SECTION 1. ACKNOWLEDGEMENTS**

The Authors would like to recognize individuals who contributed to the care of the patients reported in this case series. Sallie Lewis, NP was the first Blanchfield Army Hospital provider to notice the trend of soldiers returning from service with unexplained shortness of breath. She coordinated the efforts of others, both at Blanchfield and at Vanderbilt to systematically evaluate those experiencing symptoms. Drs. Michael Dao and Victor Agnello from Blanchfield worked with Vanderbilt and Dr. Andrew Shorr from Walter Reed to establish a protocol to evaluate symptomatic soldiers.

The authors appreciate the commitment of Debbie Paulauskas RRT, Susan McDermott, RN and Christopher Shinault, RRT from Vanderbilt who coordinated the care of these patients. Their sustained commitment to this project will have long term benefits for all who serve.

## SECTION 2. Patient Demographics.

| Patient Identification Number | Age | Gender | Height (inches) | Height (meters) | Weight (lbs) | Weight (kgs) | BMI  |
|-------------------------------|-----|--------|-----------------|-----------------|--------------|--------------|------|
| 1                             | 23  | F      | 68.0            | 1.73            | 207          | 94           | 31.5 |
| 2                             | 26  | M      | 76.0            | 1.93            | 295          | 134          | 36.0 |
| 3                             | 25  | M      | 72.0            | 1.83            | 200          | 91           | 27.2 |
| 4                             | 37  | M      | 71.0            | 1.80            | 172          | 78           | 24.0 |
| 5                             | 38  | M      | 72.5            | 1.84            | 216          | 98           | 29.0 |
| 6                             | 27  | M      | 67.0            | 1.70            | 184          | 84           | 28.9 |
| 7                             | 34  | M      | 68.5            | 1.74            | 190          | 86           | 28.5 |
| 8                             | 28  | M      | 70.5            | 1.79            | 219          | 100          | 31.0 |
| 9                             | 42  | M      | 75.0            | 1.91            | 269          | 122          | 33.7 |
| 10                            | 44  | M      | 70.5            | 1.79            | 177          | 80           | 25.1 |
| 11                            | 42  | M      | 66.5            | 1.69            | 173          | 79           | 27.6 |
| 12                            | 35  | M      | 72.0            | 1.83            | 246          | 112          | 33.4 |
| 13                            | 26  | M      | 72.0            | 1.83            | 234          | 106          | 31.8 |
| 14                            | 28  | M      | 72.0            | 1.83            | 192          | 87           | 26.1 |
| 15                            | 37  | M      | 72.0            | 1.83            | 177          | 80           | 24.1 |
| 16                            | 41  | M      | 70.0            | 1.78            | 254          | 115          | 36.5 |
| 17                            | 31  | M      | 67.5            | 1.71            | 159          | 72           | 24.6 |
| 18                            | 38  | M      | 69.5            | 1.77            | 211          | 96           | 30.8 |
| 19                            | 27  | M      | 69.5            | 1.77            | 207          | 94           | 30.2 |
| 20                            | 32  | M      | 72.0            | 1.83            | 213          | 97           | 28.9 |
| 21                            | 23  | M      | 71.5            | 1.82            | 173          | 79           | 23.8 |
| 22                            | 33  | M      | 66.0            | 1.68            | 174          | 79           | 28.1 |
| 23                            | 35  | M      | 70.0            | 1.78            | 228          | 104          | 32.8 |
| 24                            | 26  | M      | 69.0            | 1.75            | 186          | 84           | 27.5 |
| 25                            | 28  | M      | 67.0            | 1.70            | 163          | 74           | 25.6 |
| 26                            | 39  | M      | 72.5            | 1.84            | 250          | 114          | 33.5 |
| 27                            | 28  | M      | 72.0            | 1.83            | 190          | 86           | 25.8 |
| 28                            | 42  | F      | 63.0            | 1.60            | 124          | 57           | 22.1 |
| 29                            | 28  | M      | 72.0            | 1.83            | 220          | 100          | 29.9 |
| 30                            | 36  | M      | 68.0            | 1.73            | 148          | 67           | 22.6 |
| 31                            | 36  | M      | 67.0            | 1.70            | 189          | 86           | 29.7 |
| 32                            | 37  | M      | 68.0            | 1.73            | 210          | 95           | 32.0 |
| 33                            | 29  | F      | 65.0            | 1.65            | 160          | 73           | 26.7 |
| 34                            | 36  | M      | 73.0            | 1.85            | 225          | 102          | 29.7 |
| 35                            | 40  | M      | 69.0            | 1.75            | 210          | 95           | 31.1 |
| 36                            | 35  | M      | 69.0            | 1.75            | 200          | 91           | 29.6 |
| 37                            | 35  | M      | 70.5            | 1.79            | 216          | 98           | 30.6 |
| 38                            | 42  | M      | 73.0            | 1.85            | 223          | 101          | 29.5 |

BMI- Body Mass Index

**SECTION 3. Chest Radiographs and High Resolution Computed Tomography Results.**

| Patient Identification Number | Chest Radiograph Interpretation | High Resolution Computed Tomography Interpretation |
|-------------------------------|---------------------------------|----------------------------------------------------|
| 1                             | Normal                          | Mild air trapping                                  |
| 2                             | Normal                          | Normal                                             |
| 3                             | Normal                          | Normal                                             |
| 4                             | Normal                          | Mild air trapping                                  |
| 5                             | Normal                          | Normal                                             |
| 6                             | Normal                          | Normal                                             |
| 7                             | Normal                          | Normal                                             |
| 8                             | Normal                          | Normal                                             |
| 9                             | Normal                          | Mild air trapping                                  |
| 10                            | Normal                          | Small LUL density                                  |
| 11                            | Normal                          | Normal                                             |
| 12                            | Normal                          | Normal                                             |
| 13                            | Normal                          | Normal                                             |
| 14                            | Normal                          | Normal                                             |
| 15                            | Normal                          | N/A                                                |
| 16                            | Normal                          | Normal                                             |
| 17                            | Normal                          | Normal                                             |
| 18                            | Normal                          | Normal                                             |
| 19                            | Normal                          | Normal                                             |
| 20                            | Normal                          | Normal                                             |
| 21                            | Normal                          | Few bullae                                         |
| 22                            | Normal                          | Mild basilar scarring                              |
| 23                            | Normal                          | Normal                                             |
| 24                            | Normal                          | Normal                                             |
| 25                            | Normal                          | Normal                                             |
| 26                            | Normal                          | Normal                                             |
| 27                            | Lingular nodules                | Few lingular nodules                               |
| 28                            | Normal                          | Normal                                             |
| 29                            | Normal                          | Subcentimeter nodules                              |
| 30                            | Normal                          | Mild air trapping                                  |
| 31                            | Normal                          | Mild air trapping                                  |
| 32                            | Normal                          | Normal                                             |
| 33                            | Normal                          | Normal                                             |
| 34                            | Normal                          | Normal                                             |
| 35                            | Normal                          | Mild air trapping                                  |
| 36                            | Normal                          | Normal                                             |
| 37                            | Normal                          | Mild focal pleural thickening                      |
| 38                            | Normal                          | Normal                                             |

## SECTION 4. PULMONARY FUNCTION TESTING

| Patient Identification Number | FEV <sub>1</sub> (L) | FEV <sub>1</sub> (% pred) | FVC (L) | FVC (% pred) | FEV <sub>1</sub> /FVC (%) | DL <sub>CO</sub> | DL <sub>CO</sub> (% pred) | TLC (L) | TLC (% pred) | BD resp |
|-------------------------------|----------------------|---------------------------|---------|--------------|---------------------------|------------------|---------------------------|---------|--------------|---------|
| 1                             | 2.65                 | 71                        | 3.22    | 73           | 82                        | 15.49            | 48                        | 3.5     | 62           | No      |
| 2                             | 2.05                 | 40                        | 2.6     | 41           | 79                        | NA               | NA                        | 3.76    | 46           | No      |
| 3                             | 4.03                 | 85                        | 5.54    | 96           | 69                        | 32.93            | 94                        | 7.01    | 96           | No      |
| 4                             | 3.58                 | 82                        | 4.52    | 84           | 79                        | 21.70            | 53                        | 6.82    | 96           | No      |
| 5                             | 4.11                 | 91                        | 5.48    | 98           | 75                        | 33.53            | 80                        | 7.54    | 101          | Yes     |
| 6                             | 3.68                 | 88                        | 4.40    | 89           | 85                        | 29.08            | 76                        | 6.03    | 96           | No      |
| 7                             | 3.52                 | 85                        | 4.37    | 87           | 81                        | 25.24            | 66                        | 6.50    | 98           | No      |
| 8                             | 3.55                 | 78                        | 3.99    | 73           | 89                        | 21.62            | 51                        | 4.78    | 68           | No      |
| 9                             | 3.81                 | 82                        | 5.17    | 88           | 74                        | 39.47            | 90                        | 9.01    | 113          | Yes     |
| 10                            | 3.91                 | 94                        | 4.58    | 89           | 85                        | 25.34            | 66                        | 6.22    | 88           | No      |
| 11                            | 2.78                 | 74                        | 3.62    | 79           | 77                        | 18.89            | 54                        | 5.64    | 91           | No      |
| 12                            | 3.21                 | 71                        | 4.39    | 79           | 73                        | 34.30            | 82                        | 6.44    | 88           | Yes     |
| 13                            | 4.50                 | 95                        | 5.86    | 102          | 77                        | 35.31            | 80                        | 6.92    | 95           | No      |
| 14                            | 4.56                 | 97                        | 5.40    | 94           | 84                        | 27.16            | 62                        | 6.49    | 89           | No      |
| 15                            | 4.37                 | 98                        | 5.18    | 94           | 84                        | 37.71            | 91                        | 7.34    | 100          | No      |
| 16                            | 3.09                 | 76                        | 4.73    | 93           | 67                        | 28.24            | 107                       | 6.63    | 99           | No      |
| 17                            | 3.74                 | 90                        | 5.10    | 103          | 73                        | 28.14            | 74                        | 6.97    | 109          | No      |
| 18                            | 3.98                 | 95                        | 5.21    | 102          | 76                        | 33.90            | 87                        | 8.52    | 125          | No      |
| 19                            | 3.75                 | 84                        | 5.82    | 108          | 64                        | 46.54            | 112                       | 7.06    | 104          | No      |
| 20                            | 3.98                 | 86                        | 5.71    | 101          | 70                        | 30.57            | 72                        | 7.69    | 105          | No      |
| 21                            | 2.94                 | 62                        | 4.28    | 75           | 69                        | 30.06            | 68                        | 5.53    | 77           | Yes     |
| 22                            | 2.62                 | 66                        | 3.48    | 74           | 75                        | 21.28            | 59                        | 5.31    | 87           | No      |
| 23                            | 4.66                 | 108                       | 6.01    | 114          | 78                        | 35.26            | 88                        | 8.56    | 124          | No      |
| 24                            | 4.26                 | 96                        | 5.58    | 105          | 76                        | 27.97            | 68                        | 7.94    | 119          | No      |
| 25                            | 3.26                 | 78                        | 4.50    | 91           | 72                        | 28.15            | 73                        | 5.77    | 92           | No      |
| 26                            | 3.64                 | 81                        | 5.23    | 94           | 70                        | 26.37            | 63                        | 7.50    | 101          | No      |
| 27                            | 3.85                 | 82                        | 4.76    | 83           | 81                        | 23.64            | 54                        | 7.09    | 97           | No      |
| 28                            | 2.82                 | 100                       | 3.75    | 112          | 75                        | 19.55            | 74                        | 5.72    | 117          | No      |
| 29                            | 4.93                 | 105                       | 5.75    | 100          | 86                        | 33.23            | 76                        | 7.78    | 107          | No      |
| 30                            | 3.83                 | 94                        | 4.06    | 85           | 91                        | 26.15            | 69                        | 6.03    | 93           | No      |
| 31                            | 3.63                 | 92                        | 4.06    | 85           | 89                        | 18.47            | 51                        | 5.31    | 84           | No      |
| 32                            | 3.90                 | 97                        | 4.61    | 94           | 84                        | 27.01            | 73                        | 6.53    | 100          | No      |
| 33                            | 3.41                 | 102                       | 3.69    | 94           | 92                        | 19.72            | 66                        | 5.29    | 102          | No      |
| 34                            | 4.19                 | 91                        | 5.19    | 91           | 81                        | 40.55            | 95                        | 6.99    | 93           | No      |
| 35                            | 3.58                 | 94                        | 4.62    | 97           | 77                        | 25.32            | 72                        | 7.34    | 108          | No      |
| 36                            | 4.23                 | 100                       | 4.93    | 96           | 86                        | 26.62            | 68                        | 6.62    | 99           | No      |
| 37                            | 3.82                 | 89                        | 4.51    | 86           | 83                        | 31.94            | 80                        | 6.45    | 93           | No      |
| 38                            | 4.42                 | 95                        | 5.53    | 98           | 98                        | NA               | NA                        | 6.65    | 89           | No      |

FEV<sub>1</sub> – forced expiratory volume in one second, FVC – forced vital capacity, TLC – total lung capacity, DL<sub>CO</sub> – diffusing capacity of the lung for carbon monoxide

The criteria for diagnosing obstruction was an FEV<sub>1</sub>/FVC ratio of < 70. The criteria for restriction was a TLC < 80% of predicted.<sup>11, 12</sup>

## SECTION 5. CARDIO-PULMONARY EXERCISE TESTING

| Patient Identification Number | VO <sub>2</sub> max (% pred) | VAT (%VO <sub>2</sub> max) | RER  | Max HR (% pred) | RR (breaths/min) | VE/VCO <sub>2</sub> | VE <sub>max</sub> /MVV | MVV – VE (L/min) |
|-------------------------------|------------------------------|----------------------------|------|-----------------|------------------|---------------------|------------------------|------------------|
| 1                             | 60                           | NA                         | 1.02 | 70.1            | 32               | NA                  | 74.8                   | 21.7             |
| 2                             | NA                           | NA                         | NA   | NA              | NA               | NA                  | NA                     | NA               |
| 3                             | NA                           | NA                         | NA   | NA              | NA               | NA                  | NA                     | NA               |
| 4                             | 68                           | 31.5                       | 1.25 | 76.5            | 36               | 32.0                | 59.7                   | 59.2             |
| 5                             | 85                           | 44.6                       | 1.11 | 96.7            | 33               | 29.9                | 57.1                   | 72.3             |
| 6                             | 86                           | 36.0                       | 1.04 | 87.6            | 42               | 28.2                | 67.3                   | 49.4             |
| 7                             | 79                           | 33.4                       | 1.18 | 91.9            | 41               | 30.6                | 64.3                   | 51.0             |
| 8                             | 80                           | 37.9                       | 1.18 | 78.6            | 47               | 32.5                | 86.5                   | 19.3             |
| 9                             | 104                          | 55.7                       | 1.17 | 94.4            | 33               | 27.2                | 65.7                   | 53.6             |
| 10                            | 91                           | 45.5                       | 1.17 | 106.8           | 36               | 37.4                | 65.6                   | 55.1             |
| 11                            | NA                           | NA                         | NA   | NA              | NA               | NA                  | NA                     | NA               |
| 12                            | 88                           | 49.0                       | 1.12 | 90.3            | 39               | 27.0                | 68.5                   | 41.4             |
| 13                            | 90                           | 48.1                       | 1.13 | 86.6            | 35               | 24.6                | 59.8                   | 74.2             |
| 14                            | 75                           | 45.4                       | 1.05 | 80.2            | 22               | 23.8                | 36.4                   | 119.0            |
| 15                            | 95                           | 39.8                       | 1.11 | 100.5           | 37               | 27.5                | 57.7                   | 75.9             |
| 16                            | 114                          | 50.3                       | 1.02 | 78.8            | 36               | 29.5                | 85.0                   | 19.0             |
| 17                            | 64                           | 37.1                       | 1.07 | 74.6            | 30               | 29.6                | 40.9                   | 90.6             |
| 18                            | 80                           | 37.3                       | 1.00 | 86.3            | 25               | 32.7                | 50.1                   | 81.4             |
| 19                            | 81                           | 50.5                       | 1.96 | 93.8            | 44               | 33.6                | 65.7                   | 52.8             |
| 20                            | NA                           | NA                         | NA   | NA              | NA               | NA                  | NA                     | NA               |
| 21                            | NA                           | NA                         | NA   | NA              | NA               | NA                  | NA                     | NA               |
| 22                            | 76                           | 44.5                       | 1.08 | 90.9            | 47               | 35.6                | 80.1                   | 21.4             |
| 23                            | 99                           | 48.7                       | 1.01 | 85.9            | 49               | 25.4                | 58.6                   | 79.2             |
| 24                            | 63                           | 39.5                       | 1.22 | 88.7            | 21               | 24.9                | 45.9                   | 94.5             |
| 25                            | 65                           | 30.3                       | 1.33 | 99.5            | 37               | 25.0                | 74.7                   | 33.9             |
| 26                            | 118                          | 54.0                       | 1.11 | 83.4            | 34               | 28.4                | 83.2                   | 25.0             |
| 27                            | 67                           | 37.8                       | 1.33 | 91.7            | 41               | 24.9                | 48.8                   | 80.9             |
| 28                            | NA                           | NA                         | NA   | NA              | NA               | NA                  | NA                     | NA               |
| 29                            | NA                           | NA                         | NA   | NA              | NA               | NA                  | NA                     | NA               |
| 30                            | 74                           | 45.9                       | 1.24 | 95.1            | 32               | 27.2                | 61.6                   | 60.3             |
| 31                            | 99                           | 41.0                       | 0.95 | 82.1            | 27               | 25.8                | 58.1                   | 57.7             |
| 32                            | 94                           | 58.6                       | 1.23 | 96.2            | 40               | 25.1                | 64.8                   | 56.3             |
| 33                            | 110                          | 77.0                       | 1.00 | 85.9            | 34               | 28.9                | 57.4                   | 59.5             |
| 34                            | 94                           | 42.7                       | 1.11 | 87.0            | 29               | 25.8                | 51.8                   | 82.8             |
| 35                            | 83                           | 55.2                       | 1.11 | 87.2            | 22               | 24.6                | 49.1                   | 68.4             |
| 36                            | NA                           | NA                         | NA   | NA              | NA               | NA                  | NA                     | NA               |
| 37                            | 79                           | 47.1                       | 1.02 | 61.2            | 28               | 25.8                | 49.2                   | 69.0             |
| 38                            | 91                           | 42.0                       | 1.12 | 88.2            | 23               | 26.9                | 57.0                   | 70.3             |

VO<sub>2</sub> max – maximum oxygen consumption, VAT – ventilator anaerobic threshold, Max HR – maximum heart rate, RR – respiratory rate, VE – minute ventilation, VCO<sub>2</sub> – carbon dioxide production, MVV – predicted maximum minute ventilation (liters/min)

**SECTION 6.**

**FIGURE 1. DISTRIBUTION OF INVOLVED AIRWAYS AND HISTOLOGIC FINDINGS**

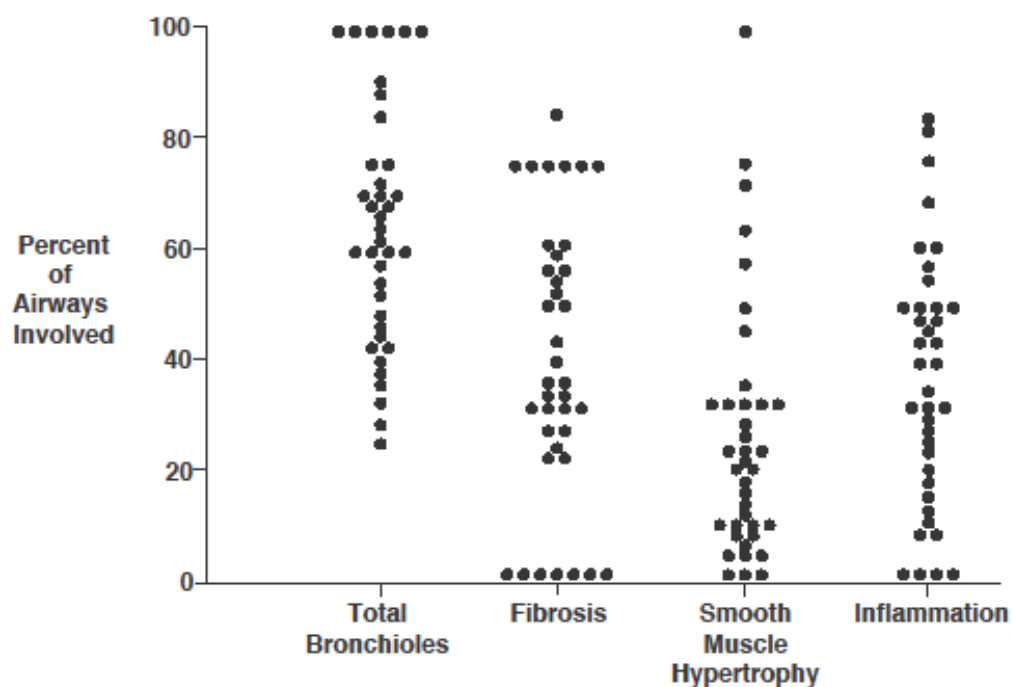

The mean number of bronchioles analyzed was  $32.2 \pm 10.6$  1 STD per subject. Each point on the graph represents the percent of abnormal airways in a single subject for each finding. The total number of airways assessed was 628, and the mean percent of abnormal airways was  $64.6\% \pm 21.7$  1 STD. The range of observed airways was 1-5 airways in 5 subjects, 6-20 airways in 13 subjects, and 20-72 in 20 subjects. . Because this is not a comparative study, statistical differences among subjects are not shown. Most airways revealed multiple lesions. See Table 4 for a breakdown of the abnormal findings.
